1

2

3 **Time dependent response of daunorubicin on cytotoxicity, cell cycle and**  
4 **DNA repair in acute lymphoblastic leukaemia**

5

6 Hussain Mubarak Al-Aamri<sup>1</sup>, Heng Ku<sup>1</sup>, Helen R Irving<sup>1\*</sup>, Joseph Tucci<sup>1</sup>, Terri Meehan-  
7 Andrews<sup>1</sup> and Christopher Bradley<sup>1</sup>

8

9 <sup>1</sup>Department of Pharmacy and Applied Sciences, La Trobe Institute for Molecular Science  
10 (LIMS), La Trobe University, P.O. Box 199, Bendigo, Victoria, Australia

11

12 \*Corresponding author

13 E-mail: [h.irving@latrobe.edu.au](mailto:h.irving@latrobe.edu.au) (HRI)

14

## 15 **Abstract**

16           Daunorubicin is commonly used in the treatment of acute lymphoblastic leukaemia  
17 (ALL). Various mechanisms of action for daunorubicin have been proposed and its action is  
18 likely to be multi-modal. The aim of this study was to explore the kinetics of double strand  
19 break (DSB) formation of three ALL cell lines following exposure to daunorubicin and to  
20 investigate the effects of daunorubicin on the cell cycle and the protein kinases involved in  
21 specific checkpoints following DNA damage and recovery periods. Three ALL cell lines  
22 CCRF-CEM and MOLT-4 derived from T lymphocytes and SUP-B15 derived from B  
23 lymphocytes were examined following 4 hours treatment with daunorubicin chemotherapy and  
24 varying recovery periods. Daunorubicin induced different degrees of toxicity in all cell lines  
25 and consistently generated reactive oxygen species. Daunorubicin was more potent at inducing  
26 DSB in MOLT-4 and CCRF-CEM cell lines while SUP-B15 cells showed delays in DSB repair  
27 and significantly more resistance to daunorubicin compared to the other cell lines as measured  
28 by  $\gamma$ H2AX assay. Daunorubicin also causes cell cycle arrest in all three cell lines at different  
29 checkpoints at different times. These effects were not due to mutations in Ataxia–telangiectasia  
30 mutated (ATM) as sequencing revealed none in any of the three cell lines. However, p53 was  
31 phosphorylated at serine 15 only in CCRF-CEM and MOLT-4 but not in SUP-B15 cells. The  
32 lack of active p53 may be correlated to the increase of SOD2 in SUP-B15 cells. The delay in  
33 DSB repair and lower sensitivity to daunorubicin seen in the B lymphocyte derived SUP-B15  
34 cells could be due to loss of function of p53 thus causing variations in the DNA repair  
35 pathways.

36

37 **Keywords** Ataxia–telangiectasia mutated (ATM); DNA double strand breaks (DSB);  $\gamma$ H2AX;  
38 p53; reactive oxygen species (ROS); superoxide dismutase (SOD2)

39

## 40 **Introduction**

41           Daunorubicin is an anthracycline antibiotic that is widely used in treating acute  
42 leukaemia, lymphoma and multiple myeloma [1]. Proposed mechanisms of anthracycline  
43 action have included: inhibition of synthesis of macromolecules through intercalation of  
44 daunorubicin into DNA strands [2, 3], interaction with molecular oxygen to produce reactive  
45 oxygen species (ROS), topoisomerase II (TOPO2) inhibition and the formation of DNA  
46 adducts [4]. There is good evidence for all these pathways and the mechanism of action of the  
47 anthracyclines is likely to be multi-modal. The type of toxic lesions that generally results from  
48 daunorubicin treatment are DNA double strand breaks (DSB). The occurrence of DSB activates  
49 PI3K-like kinases such as Ataxia–telangiectasia mutated (ATM) [5]. ATM exists as an inactive  
50 dimer and undergoes autophosphorylation and monomerisation in response to DNA DSB [6].  
51 Activated ATM phosphorylates H2AX at Ser139 residues of the carboxyl terminus to form  
52  $\gamma$ H2AX around the DNA-DSB. A large number of  $\gamma$ H2AX molecules form around the DSB to  
53 create a focus point where various DNA repair and checkpoint proteins accumulate that  
54 facilitate DNA-DSB repair [7]. In response to DNA DSB, ATM initiates repair by either non-  
55 homologous end joining (NHEJ) or homologous recombination (HR) though the factors  
56 controlling which pathway is chosen are not well understood [8]. A common outcome of both  
57 pathways is phosphorylation of the tumour suppressor gene, p53, which plays a pivotal role in  
58 the cellular response to damage as p53 regulates numerous cellular responses, including cell  
59 cycle arrest and apoptosis as well as upregulation of anti-oxidant proteins such as manganese-  
60 containing superoxide dismutase (SOD2 or MnSOD) [9].

61           Phosphorylation of p53 is an essential factor for the activation of key cell cycle  
62 checkpoints that leads to a delayed cell cycle progression, resulting in a reversible arrest at the  
63 G1/S cell cycle checkpoint [10] and is also involved in the arrest of the G2/M checkpoint [11].

64 The activation of these checkpoints allows more time for DNA repair mechanisms to be  
65 initiated to maintain genomic integrity[10].

66 Increased levels of ROS following daunorubicin treatment can directly activate ATM  
67 in vitro [12]. It is proposed that ROS activates ATM by promoting the formation of disulphide  
68 bridges, and thus stabilising the ATM dimer, rather than forming a monomer as follows  
69 activation by DSBs. Since activated ATM remains as a dimer, ATM may engage a different  
70 set of substrates and thus different cellular responses. While there is subsequent downstream  
71 activation of p53 and other proteins activated by DSB, the other downstream targets of ATM  
72 activated by ROS are thought to differ substantially [12]. This could have potential effects on  
73 cell cycle arrest and the initiation of apoptosis as well as cellular redox homeostasis.

74 The process of lymphoid tumourigenesis often involves alterations to the ATM gene  
75 resulting in ATM deficient cells which are more sensitive to oxidative stress and are likely to  
76 undergo altered DNA repair and apoptotic pathways. We have chosen to limit our study to  
77 acute lymphoblastic leukaemia (ALL) lines as daunorubicin is widely used in the treatment of  
78 this leukaemia [13]. Little is known about the ATM sequence in ALL cell lines used in medical  
79 research. One of the aims of this study was to explore potential functional mutations in ATM  
80 that may affect how cells handle chemotherapy treatment. To this end, the ATM coding  
81 sequences in T-lymphoblast derived CCRF-CEM and MOLT-4 cells and B-lymphoblast  
82 derived SUP-B15 cells were analysed through Sanger sequencing.

83 Following daunorubicin treatment, activation of ATM occurs via different mechanisms.  
84 Firstly, ATM activation by DSB involves autophosphorylation at Ser1981 and monomerization  
85 of the native dimer, and subsequent phosphorylation of H2AX to form  $\gamma$ H2AX [14]. We  
86 monitored DSB formation by measuring the formation of  $\gamma$ H2AX following treatment of  
87 several ALL cell lines with daunorubicin. As the repair process is dynamic and may involve  
88 sequential involvement of different repair pathways we analysed DSB over a time course.

89 Secondly, as ROS production may activate ATM, we measured ROS production following  
90 exposure of ALL cells to daunorubicin. The impact  $\gamma$ H2AX and ROS levels have on ATM  
91 function and cell survival were analysed.

92

## 93 **Materials and methods**

### 94 **Cell lines**

95 Two T-lymphoblastic leukaemia cell lines, CCRF-CEM and MOLT-4, and a B-  
96 lymphoblastic leukaemia cell line, SUP-B15, were obtained from the American Type Cell  
97 Culture Collection (ATCC). Cells were stored frozen in liquid nitrogen in cryovials until use.  
98 The CCRF-CEM and MOLT-4 cells were cultured in RPMI-1640 (Gibco™ -Life  
99 Technology, NY, USA), while the SUP-B15 cells were cultured in IMDM (Gibco™ -Life  
100 Technology, NY, USA) supplemented with 10 % foetal calf serum (FCS) and 5 mM glutamine.  
101 Cells were incubated at 37°C in aerobic atmosphere containing 5% CO<sub>2</sub>. Cells were used before  
102 10 passages.

### 103 **Daunorubicin treatment and recovery**

104 Daunorubicin (Sigma-Aldrich NSW, Australia) was prepared as 5 mM stock solutions  
105 in dimethyl sulfoxide (DMSO) and stored in aliquots at -20°C. Cells were plated onto six well  
106 plates at a seeding density of 1×10<sup>6</sup> cells per well. Cells were treated with 10 μM daunorubicin  
107 and incubated for 4 hours at 37°C in atmosphere of 5% CO<sub>2</sub>. Treatment media was removed  
108 by centrifugation at 200 g for 5 minutes and replaced with recovery media (media only) for 4,  
109 12 or 24 hours.

110 **MTT (3-(4,5-dimethylthiazol-2-yl)-2-5 diphenyltetrazolium**  
111 **bromide) assay**

112 After treatment, cells were washed with PBS (phosphate buffer saline) and centrifuged  
113 at 4°C at 500 g for 5 minutes. The cells were then plated into 96-well plate (3 x 10<sup>4</sup> cells per  
114 well), and 0.25 mg/ml MTT (Sigma-Aldrich) was added to each well and then incubated at  
115 37°C for 3 hours protected from light. Formazan crystals were solubilized by incubation in 10  
116 % DMSO at room temperature for 1½ hours before reading absorbance at 570 nm using a Flex  
117 station 3 (Molecular Devices, California, USA).

118 **ROS flow cytometry assay**

119 The cells were plated onto six well plates at a seeding density of 1 × 10<sup>6</sup> cells per well,  
120 prior to treatment and recovery. The cells were then collected and centrifuged at 400 g for 5  
121 minutes before resuspending in fresh media at 1 x 10<sup>5</sup> cells ml<sup>-1</sup>. One ml of cell suspension was  
122 added to 1.5 ml microcentrifuge tubes. As a negative control 5 mM of ROS inhibitor (N-acetyl-  
123 L-cysteine) (Enzo-life sciences, NY, USA) was added at least 30 minutes prior to induction,  
124 while 500 µM pyocyanin (ROS inducer) was used as a positive control [15]. ROS detection  
125 solution (5 mM, Enzo-life sciences) was added to all tubes before incubation at 37° C for 30  
126 minutes in the dark. Finally, the intensity of cell fluorescence was recorded by flow cytometry  
127 (Accuri® C6, Flow cytometry, Ann Arbor,MI, USA) using 500 nm excitation and 600 nm  
128 emission.

129 **Gamma H2AX assay**

130 Cells were plated in a six well plate at a seeding density of 2 × 10<sup>5</sup> cells per well, prior  
131 to treatment and recovery. The cells were then transferred into 1.5 ml microcentrifuge tubes  
132 and centrifuged at 200 g for 5 minutes. After centrifugation, cells were washed twice with ice  
133 cold TBS (Tris buffered saline, pH 7.4) to remove traces of ethanol in samples. All the samples

134 were kept on ice during assay procedure. After washing with TBS, cells were resuspended in  
135 500  $\mu$ l of ice cold TFX (1 x TBS, 4% FCS, 0.1% Triton-X100 made fresh for each experiment)  
136 and allowed to rehydrate for 10 minutes. Cells were centrifuged again at 200 g and supernatant  
137 was removed. Cells were resuspended in 100  $\mu$ l anti-H2AX (pSer139) rabbit polyclonal IgG  
138 (ThermoFisher Scientific, Waltham, MA, USA) diluted at 1:500 in 1x TFX and incubated at  
139 room temperature for 2 hours. Cells were then washed twice with 1x TFX by centrifugation at  
140 200 g and the supernatant discarded. Cells were resuspended in 100  $\mu$ l goat anti-rabbit IgG  
141 Alexa Fluor 488 conjugate antibody (ThermoFisher Scientific, USA) diluted at 1:200 in 1x  
142 TFX for 1 hour at room temperature, protected from light. Cells were washed twice with 1x  
143 TFX and resuspended in 300  $\mu$ l TFX containing 5  $\mu$ g ml<sup>-1</sup> propidium iodide (Sigma Aldrich)  
144 and analysed using flow cytometry. Data was analysed using CFlow Plus software (Accuri®).  
145 Log fluorescence against cell count was plotted.

## 146 **Cell cycle analysis**

147 Fixed samples were centrifuged at 200 g and washed twice with ice-cold PBS. The cells  
148 then resuspended in staining solution containing 25  $\mu$ g ml<sup>-1</sup> propidium iodide and 100  $\mu$ g ml<sup>-1</sup>  
149 RNase A in cold PBS and incubated at 37°C for 30 minutes. All the samples were analysed by  
150 using a flow cytometer (BD Accuri C6, California, USA). A total of 10,000 events were  
151 recorded for each sample.

## 152 **Western blotting and dot array**

153 After treatment with daunorubicin, cells were washed with PBS containing 1 mM  
154 phenylmethylsulfonyl fluoride (PMSF) and centrifuged at 200 g for 5 minutes at 4°C. Pelleted  
155 cells were suspended with 100  $\mu$ l lysis buffer (Abcam, VIC, Australia), 1 mM PMSF and 10  
156 mg ml<sup>-1</sup> aprotinin, and incubated on ice for 30 minutes. Samples were then centrifuged at  
157 15,000 g for 20 minutes at 4°C and the supernatants collected. Protein concentration of each  
158 sample was determined using BSA protein assay according to the manufacturer's protocol

159 (BIO-RAD, NSW, Australia). Each protein sample (30 µg) was denatured in 5 µl LDS (lithium  
160 dodecyl sulfate buffer) with 200 mM DTT at 70°C for 10 minutes (Abcam). Samples were  
161 loaded onto 10% or 12% Tris Tricine SDS-PAGE gels (Abcam) and fractionated at 180 V for  
162 30 to 70 minutes in the presence of SDS running buffer (Abcam, ab 119195). Samples were  
163 transferred to polyvinylidene fluoride (PVDF) membrane using a mini trans-blot apparatus  
164 according to the manufacture's protocol (BIO-RAD) with 1x transfer buffer (Abcam).  
165 Following protein transfer, the PVDF membrane was blocked with 5% non-fat milk in TBS-T  
166 (20 mM Tris, pH 8.0, 150 mM NaCl, 0.1% (v/v) Tween 20) overnight. The PVDF membrane  
167 was washed three times with TBS-T each for 5 minutes and then incubated in either anti-SOD2  
168 (1:1000), anti-p53 (1:1000) or anti-beta tubulin (1:5000) antibodies (Cell Signalling  
169 Technology, MA, USA) diluted in blocking buffer for 4 hours at 4°C with gentle agitation. The  
170 membrane was then washed with in TBS-T three times, before adding goat anti-rabbit IgG  
171 secondary antibody (1:10,000) (Cell Signalling Technology) and incubating for 4 hours at room  
172 temperature. The PVDF was then washed with TBS-T and incubated with ChemiFast  
173 Chemiluminescence substrate (BIO-RAD). Chemiluminescence was measured in a G BOX  
174 (Syngene, Cambridge, UK) and the immunodensity of the bands was measured using gene tool  
175 Syngene software.

176         The impact of treatment on proteins involved in cell cycle arrest was explored using a  
177 commercially available human apoptosis array kit (Abcam, UK) according to the  
178 manufacturer's instructions. After treatment with daunorubicin, cells were incubated for a  
179 further 12 hours in recovery media. Cells were removed from plates and processed according  
180 to the manufacturer's instructions Sample lysate protein concentration was determined with  
181 BioRad DC Protein Assay Kit II before blotting and immunoprobng and detection of  
182 chemiluminescence signal as described above.

183



## 184 **ATM Sequencing**

185 RNA was isolated from  $5 \times 10^6$  of CCRF-CEM, MOLT-4 or SUP-B15 cells using SV  
186 total RNA isolation kit (Promega, VIC, Australia). Reverse transcription was performed using  
187 the ImProm-IITM Reverse transcription system (Promega, VIC, Australia) kit. 1  $\mu$ g of RNA  
188 samples were mixed with 0.5  $\mu$ g of oligo dT, 0.5  $\mu$ g of random primers and nuclease-free water.  
189 The reverse transcription mix was prepared according to the Promega protocol. RNA and  
190 primers were combined with reverse transcription mixture and incubated accordingly:  
191 Annealing at 25° C for 5 minutes; extension at 42° C for one hour and reverse transcriptase  
192 inactivation by incubation at 70° C for 15 minutes. The cDNA product was stored at -20° C  
193 prior to use.

194 Primers were designed to ensure that the entire coding region of the Ataxia-  
195 telangiectasia mutated (ATM) gene was amplified (Fig 1). Each set of primers were designed  
196 based on the wild type ATM (U82828.1, NCBI) sequence. Primers used in the experiment were  
197 designed as follows: primer length was between 18-25 base pairs; the primer melting  
198 temperature was calculated by A plasmid editor (ApE;  
199 <http://biologylabs.utah.edu/jorgensen/wayned/ape/>) software, with primers having a minimum  
200 melting temperature of 48°C; each primer was designed to have 40-60% GC content; and  
201 palindromic sequences within primers were avoided. Primer sequences are detailed in S1  
202 Table. The use of a high fidelity, low error rate DNA polymerase enzyme in the PCR reactions  
203 was essential in order to minimise errors in amplicon extension and subsequent sequencing  
204 data. 1  $\mu$ g cDNA samples were used as a template to generate full length high fidelity  
205 amplicons. The PCR reactions contained 0.5  $\mu$ M forward primer, 0.5  $\mu$ M reverse primer, 1  $\mu$ l  
206 of cDNA sample, 1x Q5 PCR high fidelity Master Mix (NEB, MA, USA), with PCR quality  
207 water making the balance to 25  $\mu$ l. PCR conditions for the different primer pairs are defined in  
208 S2 Table. PCR products were cleaned in 50  $\mu$ l of elution buffer using the Ultra clean PCR clean

209 up kit (Mo Bio, CA, USA). Confirmation of PCR product size was performed by 1 % agarose  
210 gel electrophoresis. Sanger sequencing was performed by the Australian Genome Research  
211 Facility in Brisbane and aligned with NCBI sequences of the ATM gene.

212

213 **Fig 1. Schematic structure of the ATM gene and protein. (A)** ATM cDNA diagram and primer  
214 positions. **(B)** ATM exon diagram and primer position. The red arrows indicate exons. The yellow  
215 arrows indicate size of cDNA sequence. The green arrows indicate primer position. Both **(A)** and **(B)**  
216 diagrams were created using CLC Genomics Workbench (CA, USA). **(C)** Schematic diagram of the  
217 regions of the ATM protein kinase. The FAT domain is autophosphorylated, PI3K is the kinase  
218 domain and FATC domain interacts with Tip60 protein to activate ATM.

219

## 220 **Data analysis**

221 Data is presented as mean  $\pm$  standard error of the mean (SEM) and is analysed by one-  
222 way ANOVA followed by the Tukey's post-hoc test using GraphPad Prism 7 software.  $P <$   
223 0.05 is considered statistically significant.

224

## 225 **Results**

### 226 **Effects of daunorubicin on cell viability**

227 Daunorubicin treatment causes many different types of toxic lesions. The MTT assay  
228 was utilised to assess changes in the number of the three ALL cell lines used in this study. Each  
229 of the cell lines displayed a different pattern of sensitivity to daunorubicin. Daunorubicin  
230 toxicity was observed in MOLT-4 cells after 4 hours in recovery media, the earliest time  
231 examined (Fig 2A). The level of reduction in cell density was about 50% compared to the  
232 control after 4 hours ( $0.56 \pm 0.05$ ,  $P = 0.0018$ ), and remained at these levels after 12 hours ( $0.54$   
233  $\pm 0.04$ ,  $P = 0.0011$ ) and ( $0.57 \pm 0.02$ ,  $P = 0.014$ ) 24 hours. CCRF-CEM cells exposed to

234 daunorubicin (Fig 2B) did not show significant reduction in cell density until 12 hours in the  
235 recovery media ( $0.48 \pm 0.07$ ,  $P = 0.0002$ ) compared to the control. The significant reduction in  
236 the cell density level remained after 24 hours recovery ( $0.45 \pm 0.07$ ,  $P < 0.0001$ ). Treatment of  
237 SUP-B15 cells (Fig 2C) with daunorubicin resulted in a biphasic response. Initially after 4  
238 hours in recovery media there was a significant decrease in cell density compared to the control  
239 ( $0.61 \pm 0.07$ ,  $P = 0.006$ ). When the cells were incubated in 12 hours recovery media, the  
240 decrease in cell density was comparable to the control ( $1.08 \pm 0.07$ ) and not significantly  
241 reduced at 24 hours ( $0.76 \pm 0.06$ ;  $P = 0.945$ ).

242

243 **Fig 2. Effect of daunorubicin on cell viability.** Relative cell density following treatment with 10  $\mu$ M  
244 daunorubicin for 4 hours and followed by 4, 12 and 24 hours (post recovery time) of recovery media  
245 for (A) MOLT-4, (B) CCRF-CEM and (C) SUP-B15 cells was determined using the MTT assay. Bars  
246 indicate mean of a total of six replicates  $\pm$  SEM, from three independent experiments. Results were  
247 normalised to the control at each time point. \*  $P < 0.05$ , \*\*  $P < 0.01$ ; \*\*\*  $P < 0.001$  one-way ANOVA  
248 followed by Tukey's post-hoc test.

249

## 250 **Effects of daunorubicin on production of damaging reactive** 251 **oxygen species**

252 A mechanism of action of daunorubicin is to generate reactive oxygen species (ROS),  
253 which causes DNA damage, particularly it will induce DSBs [16]. To assess the changes in  
254 ROS production over time following treatment with daunorubicin, the total ROS assay was  
255 performed (Fig 3 and S1 Fig). Since daunorubicin can stimulate the production of ROS via  
256 several processes, and cells have several mechanisms for quenching toxic ROS, the differences  
257 in ROS over time reflects not only cell sensitivity, but also long term daunorubicin  
258 effectiveness. Treatment of MOLT-4 cells (Fig 3A) with 10  $\mu$ M daunorubicin resulted in a

259 significant increase in ROS production after 4 hour recovery period ( $10.48 \pm 0.03$ ,  $P < 0.0001$ )  
260 compared to the control. Increase in ROS production reached a maximum after 12 hours  
261 recovery ( $127.7 \pm 2.47$ ,  $P < 0.0001$ ) and declined significantly after 24 hours ( $24.90 \pm 0.40$ ,  $P$   
262  $< 0.0001$ ). CCRF-CEM cells exposed to daunorubicin (Fig 3B), displayed a similar pattern of  
263 ROS production. There was a significant increase in ROS production after 4 hours recovery  
264 period ( $47.33 \pm 0.77$ ,  $P < 0.0001$ ) compared to the control. This increase in ROS production  
265 reached a maximum after 12 hours recovery ( $133.1 \pm 1.95$ ,  $P < 0.0001$ ), then decreased after  
266 24 hours recovery ( $16.0 \pm 0.21$ ,  $P < 0.0001$ ). SUP-B15 cells (Fig 3C) when treated with  
267 daunorubicin did not appear to be as sensitive to the production of ROS compared to MOLT  
268 and CCRF-CEM cells. SUP-B15 cells showed a significant increase in ROS production after  
269 4 hours recovery period ( $23.09 \pm 3.11$ ,  $P < 0.0001$ ) compared to the control. The amount of  
270 ROS produce was comparable following 12 hours incubation in the recovery media ( $24.75 \pm$   
271  $2.79$ ;  $P < 0.0001$ ) before declining after 24 hours recovery ( $9.91 \pm 1.46$   $P = 0.0172$ ).

272

273 **Fig 3. Total Reactive oxygen species (ROS) induced by daunorubicin.** MOLT-4 (A), CCRF-CEM  
274 (B) and SUP-B15 (C) cells exposed to 4 h treatment with 10  $\mu$ M daunorubicin, followed by 4, 12 and  
275 24 hours (post recovery period) in recovery media. Graph indicates mean of total of six replicates  $\pm$   
276 SEM, from three independent experiments. Results were normalised to the control at each time point.  
277 \*  $P < 0.05$ , \*\*  $P < 0.01$ ; \*\*\*  $P < 0.001$ ; \*\*\*\*  $P < 0.0001$  one-way ANOVA followed by Tukey's post-  
278 hoc test.

279

## 280 **Effects of daunorubicin on DNA double strand breaks**

281 The lesions most detrimental to cell survival following treatment with daunorubicin,  
282 include the DSBs. The production and subsequent repair of these lesions was assessed over  
283 time by detecting  $\gamma$ H2AX. This also gives an indication of how effective DNA repair processes

284 are within T or B lymphoblast derived cells (Fig 4 and S2 Fig). After 4 hours recovery, there  
285 was no significant increase in  $\gamma$ H2AX fluorescence intensity ( $2.81 \pm 0.88$ ;  $P = 0.127$ ) compared  
286 to the control in MOLT-4 cells (Fig 4A). However, after 12 hours in recovery media, there was  
287 a significant increase in  $\gamma$ H2AX expression ( $3.76 \pm 0.57$ ;  $P = 0.0065$ ). When cells were  
288 incubated for 24 hours in the recovery media,  $\gamma$ H2AX expression decreased and was  
289 comparable to control levels ( $2.35 \pm 0.622$ ;  $P = 0.423$ ). When CCRF-CEM cells were allowed  
290 to recover for 4 hours (Fig 4B) following initial 4 hours treatment with daunorubicin, there was  
291 a significant increase in the number of cells that stained positive for  $\gamma$ H2AX when compared  
292 to the control ( $3.91 \pm 0.54$ ;  $P = 0.0002$ ).  $\gamma$ H2AX expression decreased after 12 hours in recover  
293 media, comparable to control levels ( $2.37 \pm 0.38$ ;  $P = 0.471$ ). Levels of  $\gamma$ H2AX remained at  
294 this level after 24 hours recovery ( $2.24 \pm 0.69$ ;  $P = 0.277$ ). When SUP-B15 cells (Fig 4C) were  
295 incubated for 4 hours in recovery media, there was a significant increase in the percentage of  
296 cells expressing  $\gamma$ H2AX when incubated in the recovery media for 4 hours ( $2.45 \pm 0.45$ ;  $P =$   
297  $0.0148$ ). Expression levels remained elevated after 12 hours ( $2.59 \pm 0.23$ ;  $P = 0.0024$ ) and 24  
298 hours incubation in the recovery media ( $3.13 \pm 0.43$ ;  $P < 0.0001$ ).

299

300 **Fig 4. Effect of daunorubicin on DSB.** Measurement of DSB by  $\gamma$ H2AX fluorescence for MOLT-4  
301 (A), CCRF-CEM (B) and SUP-B15 (C) cells following 4 h treatment with 10  $\mu$ M daunorubicin,  
302 followed by 4, 12 and 24 hours (post recovery period) in recovery media. Median intensities from (flow  
303 cytometry histograms of the raw data) were used to plot the bar diagram. Graph indicates mean of total  
304 of six replicates  $\pm$  SEM, from three independent experiments. Results were normalised to the control at  
305 each time point. \*  $P < 0.05$ , \*\*  $P < 0.01$ ; \*\*\*  $P < 0.001$  one-way ANOVA followed by Tukey's post-  
306 hoc test.

307

308 **Effects of daunorubicin on cell cycle progression**

309           Following the toxic effects of daunorubicin, the cell should respond by initiating cell  
310 cycle arrest to allow DNA repair processes to occur. Analysis of cell cycle stages can be  
311 assessed using propidium iodide staining, to determine the impact of daunorubicin on cell cycle  
312 progression or arrest at different times after treatment (Fig 5). As shown in Fig 4A, cell cycle  
313 profiles for MOLT-4 after 4 hours in recovery media (15.5:42:42.5; G1:S:G2/M) there was an  
314 increase in the proportion of cells in G2/M phase of the cell cycle when compared to control  
315 (48:41:11), with a subsequent decrease in G1 phases. The proportion of cells continued to  
316 accumulate in the G2/M phase after 12 hours recovery (10.5:23.5:66) with further reduction in  
317 G1 phase, but after 12 hours there was also a reduction in cells in S phase. After 24 hours  
318 recovery time, the cell cycle profile returned to normal levels (49:32.5:18.5). Similarly, the cell  
319 cycle profiles for CCRF-CEM cells (Fig 5B) showed a dramatic increase in the proportional of  
320 cells in G2/M phases of cell cycle when compared to control. The proportion of cells in the  
321 G2/M phase continued to increase after 12 hours recovery. The accumulation of cells in the  
322 G2/M phase resulted in a reduction of cells in the G1 and S phase of cell cycle. After 24 hours  
323 recovery time, the cell cycle profile returned to normal levels. In contrast, the cell cycle profiles  
324 for SUP-B15 cells (Fig 5C) showed an increase in the proportion of cells in G1 phase and G2/M  
325 phase of cell cycle when compared to control after 4 hours of incubation in recovery media.  
326 The proportion of cells in G1 phase was further increased when the cells were incubated after  
327 12 hours, further increasing after 24 hours recovery. Cells accumulating in the G1 phase  
328 resulted in a reduction of cells in the G2/M and S phase of cell cycle.

329

330 **Fig 5. Daunorubicin alters cell cycle profiles.** Cell cycle profiles for MOLT-4 (A), CCRF-CEM (B)  
331 and SUP-B15 (C) cells following 4 h treatment with 10  $\mu$ M daunorubicin followed by 4 hour, 12 hour  
332 and 24 hour in recovery media. Graph indicates mean of total of six replicates  $\pm$  SEM, from three  
333 independent experiments. \* Results were normalised to the control at each time point. \* P < 0.05, \*\* P

334 < 0.01; \*\*\* P < 0.001; ns = non-significant one-way ANOVA followed by Tukey's post-hoc test.

335 Black G1 phase, Pink S phase and Blue G2/M phase.

336

## 337 **Expression of p53 and SOD2**

338 DSB activates ATM [17] and the differences in cell cycle recovery may be due to  
339 mutations in ATM. To determine if functional mutations in ATM were affecting how cells  
340 handle chemotherapy treatment, the full ATM sequence in T-lymphoblast derived CCRF-CEM  
341 and MOLT-4 cells and B-lymphoblast derived SUP-B15 cells were explored through Sanger  
342 sequencing. The coding region was fully amplified using a selection of primer pairs (Fig 1) and  
343 the products were sequenced. This was done for each of the cell lines and no mutations found  
344 in the full ATM coding region.

345 Following detection of DSB, activation of p53 initiates several downstream processes,  
346 including activation of SOD2 to quench ROS, and maintain cell survival. Analysis of p53 in  
347 the three ALL cell lines following treatment, indicated a lack of p53 phosphorylation at Ser15  
348 in SUP-B15 cells. Whereas the phosphorylation of p53 in both CCRF-CEM and MOLT4 cell  
349 lines was observed (Fig 6A). SOD2 was unchanged in both MOLT-4 and CCRF-CEM and  
350 increased in SUP-B15 cells (Fig 6B), although the later effect could be due to reduced ROS  
351 production seen in SUP-B15 cells (Fig 3C). This dysfunction of p53 would also have an impact  
352 on cell cycle regulators, including p21 and p27, which are both down regulated in SUP-B15  
353 cells following treatment with daunorubicin (Table 1).

354

355 **Fig 6. Western analysis of p53 and SOD2.** (A) Proteins from SUP-B15, CCRF-CEM and MOLT-4  
356 cell lines treated with 10  $\mu$ M daunorubicin for 4 h or untreated (control) were probed with anti-SOD2  
357 or anti-phospho-p53 at Ser15. Separate gels from the same cell preparations were analysed for tubulin  
358 expression. (B) Evaluation of MnSOD2 expression. Tubulin expression was analysed as a

359 loading control, results are expressed as ratio of SOD2 to tubulin intensity. Bars indicate mean  
 360 of at least four replicates  $\pm$  SEM, from two independent experiments. \*\*\* P < 0.001 one-way  
 361 ANOVA.

362

363 **Table 1** Summary of results from the apoptosis array showing the effect daunorubicin on p53, p21 and  
 364 p27 in MOL-4, CCRF CEM and SUP-B15 cell lines.

| Protein    | MOLT-4         |                               | CCRF-CEM       |                               | SUP-B15        |                               |
|------------|----------------|-------------------------------|----------------|-------------------------------|----------------|-------------------------------|
|            | DNR<br>4 hours | Recovery<br>Media<br>12 hours | DNR<br>4 hours | Recovery<br>Media<br>12 hours | DNR<br>4 hours | Recovery<br>Media<br>12 hours |
| <b>p53</b> | ↑              | –                             | ↑              | –                             | ↓              | ↓                             |
| <b>p21</b> | ↑              | –                             | ↑              | –                             | ↓              | ↓                             |
| <b>p27</b> | ↑              | -                             | ↑              | ↑                             | ↓              | -                             |

365

## 366 Discussion

367 Assessment of the impact of daunorubicin on the selected leukaemic cell lines revealed  
 368 very different cellular responses and sensitivity to daunorubicin. The ALL cell lines, MOLT-4  
 369 and CCRF-CEM which are derived from acute T-lymphoblastic leukemia, displayed a  
 370 cytotoxic response, with DNA-DSB and cell cycle arrest to allow subsequent DNA repair to  
 371 occur. However, the ALL cell line, SUP-B15 derived from an acute B-lymphoblastic  
 372 leukaemia, displayed a different pattern of response. SUP-B15 cells showed no signs of DNA-  
 373 DSB repair, and cells accumulating in G1 phase, as opposed to G2/M in the other cell lines.  
 374 Regulation of cell cycle progression and DNA repair through activation of p53, p21 and p27,  
 375 was reduced differing from the observed in MOLT4 and CCRF-CEM cells.

376 All cell lines in this study responded to the cytotoxic effects of daunorubicin with a  
 377 reduction in cell number which supports previous studies [13, 18, 19]. MOLT-4 cells appeared



378 to be the most sensitive, with a persistent decrease in cell number observed as early as 4 hours  
379 post treatment. CCRF-CEM cells did not succumb to the cytotoxicity until 12 hours post  
380 treatment, levels at this time were comparable to MOLT-4, and remained at this level for the  
381 duration of the study time. However, SUP-B15 cells displayed a different pattern of response  
382 and appeared less sensitive to the drug especially after 12 and 24 hours. These differences  
383 suggest that daunorubicin induced more DNA damage in both MOLT-4 and CCRF-CEM cells  
384 compared to SUP-B15 cells. The concentration of daunorubicin (10  $\mu$ M) used in this study was  
385 shown to be effective in Jurkat T lymphoma and HL-60 promyelocytic leukaemia cell line [20]  
386 and sarcoplasmic reticulum cardiac cells [21].

387 The effectiveness of a chemotherapeutic agent is dependent on several factors;  
388 concentration, exposure time, doubling time of the cell line, state of DNA Damage Response  
389 (DDR) mechanisms and type of damage induced. Most of these characteristics are primarily  
390 determined by the genetics of the cell line. Many chemotherapeutic agents, such as  
391 daunorubicin, elicit their damage by disrupting or targeting the replication of DNA during the  
392 S phase of the cell cycle. Cells that complete more cell cycles (have shorter doubling times)  
393 are therefore more vulnerable to the chemotherapeutic agent when compared to a cell line that  
394 completes fewer cell cycles (longer doubling time). The CCRF-CEM cells have a doubling  
395 time ranging from 20 to 30 hours [22], therefore the CCRF-CEM cells would have at least one  
396 cell cycle to identify and repair the damage induced by the chemotherapeutic tested. MOLT-4  
397 cells have a doubling time of approximately 22-24 hours [23-25]. So again, MOLT-4 would  
398 have one cell cycle to identify and repair the damage induced by the chemotherapeutic agents.  
399 SUP-B15 cells would have only entered the second cell cycle during the observed treatment  
400 time as the doubling time of SUP-B15 cells is approximately 46 hours, with reports ranging  
401 from 35 to 60 hours [26, 27]. This may explain the observed results as half of SUP-B15 cells  
402 have been affected, while MOLT-4 and CCRF-CEM the majority of cells have been damaged.

403 Free radical formation and oxidative stress play an important role in the cytotoxicity of  
404 daunorubicin as ROS may serve as an intracellular signal of apoptotic events [28].  
405 Daunorubicin induced ROS in the three leukaemic cells lines with variations over the time  
406 period. The T-lymphoblast cell lines, CCRF-CEM and MOLT-4 produced ROS at high levels  
407 from 4 to 12 hours before declining sharply over the next 12 hours. However, the B lymphoblast  
408 SUP-B15 cells consistently expressed significant but relatively lower ROS levels throughout  
409 the experimental period. Daunorubicin induces cytotoxicity in the cells by the generation of  
410 ROS and enhanced G2/M phase cell cycle [29]. Increases in the level of ROS is regulated by  
411 several signal networks, Antioxidants such as superoxide dismutase (SOD2), catalase (CAT)  
412 and glutathione peroxidase 1 (GPx) play a central role [30]. The overall effect of the antioxidant  
413 system depends on the intracellular balance between these antioxidant enzymes rather than a  
414 single component. In the antioxidant enzyme system, SOD2 catalyses the dismutation of  
415 superoxide radicals to H<sub>2</sub>O<sub>2</sub>. p53-dependent up-regulation of SOD2 (or MnSOD) and  
416 glutathione peroxidase 1 (GPx) is important in human lymphoblasts [31].

417 Although ATM was expressed in all three cell lines and contained no mutations in the  
418 coding regions, p53 was phosphorylated in MOLT-4 and CCRF-CEM but not in SUP-B15 after  
419 daunorubicin treatment. Hence, p53 in SUP-B15 is more likely to be mutated. Leukaemia cells  
420 often possess mutations in p53 gene [32]. P53 is an essential tumour suppressor gene, that also  
421 regulates SOD2 gene expression [33]. Thus in SUP-B15 cells where p53 is not activated, the  
422 antioxidant effects of SOD2 will not modulate ROS levels during the daunorubicin treatment  
423 [34]. However, p53-mediated production of ROS can be cell type and species dependent [31].

424 To determine the impact of daunorubicin on the DSBs in the selected ALL cell lines,  
425 and the subsequent repair, we analysed the gamma H2AX levels. The histone H2AX plays a  
426 key role in DNA-DSB repair by rapidly phosphorylating serine residues to form  $\gamma$ H2AX foci  
427 near the DSBs [35]. Treatment of all cell lines with daunorubicin resulted in an increase in

428  $\gamma$ H2AX staining within 4 hours indicating this is an appropriate treatment time and supporting  
429 previous studies that show daunorubicin causes DSBs [36, 37]. To follow the dynamics of DSB  
430 repair, cells were allowed to recover over 24 hours when there were still significant levels of  
431 DSBs detected. This indicates that even though repair was occurring, not all DSBs induced  
432 were repaired during this time. Notably, SUP-B15 cell line showed more pronounced DSBs at  
433 12 and 24 hours recovery time compared to MOLT-4 and CCRF-CEM cell lines, suggesting  
434 that different DDR mechanisms or pathways were involved. DSB repair in CCRF-CEM cells  
435 appeared the most robust, with repair occurring after 4 hours in recovery and total repair after  
436 24 hours. MOLT-4 showed that the DSB repair took place after 12 hours in recovery. This  
437 indicates that the 24 hours recovery time is enough for some repair of daunorubicin induced  
438 DSB in MOLT-4 and CCRF-CEM cells. On the other hand, even after 24 hours recovery, the  
439 level of DSBs in SUP-B15 cells was significantly higher indicating incomplete DSB repair.  
440 Most cells have an intrinsic repair process in response to any DNA damage, including those  
441 induced by daunorubicin. The effectiveness of the DDR will be cell line dependent, with some  
442 cell lines having mutations in the key signalling intermediary p53 [38, 39] as seen in SUP-B15  
443 in this study. Dependent on the DNA damage that has been induced, single stranded breaks or  
444 DSB, different DDR pathways will be signalled. Daunorubicin induced DNA-DSB primarily  
445 utilise the HR and NHEJ repair pathways [40]. Mutations to important elements of the HR or  
446 NHEJ, can compromise the DDR mechanisms, resulting in less damage being identified and  
447 appropriate cellular responses stimulated. Increased expression of such enzymes leads to  
448 increased repair following exposure to chemotherapies inducing DSB, including daunorubicin,  
449 and this is a key mechanism in the ever growing problem of chemoresistance to therapy [41,  
450 42]. The difference in potency of the chemotherapy in the three cell lines could be due to the  
451 difference in molecular profiles between the three cell lines, and one pertinent example is p53  
452 status.

453           Along with reduction of detectable  $\gamma$ -H2AX, and thus DSBs, during the recovery time,  
454 DNA-PK, ATM and ATR also initiate cell cycle arrest. Exposing SUP-B15 cells to  
455 daunorubicin caused a progressive accumulation of cells in G1 phase while daunorubicin  
456 treatment of MOLT-4 and CCRF-CEM cells caused a profound accumulation of cells in G2/M  
457 phase, with a progressive reduction of cells in G1 and S phase of the cell cycle. However, after  
458 24 hours recovery the cell cycle profile of MOLT-4 and CCRF-CEM cells was comparable to  
459 the control, suggesting the impact on cell cycle was no longer expressed. This is consistent  
460 with the previous observation in HL-60 cells (myeloid leukaemic cell line) where daunorubicin  
461 caused a marked G2/M accumulation after 24 hours of exposure to the drug [43]. The profound  
462 accumulation in G2/M has also been observed in CCRF-CEM cells treated with the  
463 anthracycline doxorubicin [44]. Doxorubicin also induced profound G2/M arrest in HCT-116  
464 human colon carcinoma cells and was accompanied by activation of p53 and induction of p21  
465 mRNA and protein expression [45].

466           The cell line dependent variations in various enzyme expression levels, particularly  
467 p53, p27 and p21, could be a factor in the differences in the degree of cell cycle arrest and  
468 subsequent DSB repair. In many cancer cells, loss of p53 is thought to be a predictor of failure  
469 to respond to chemotherapy and radiotherapy [46]. Treatment of MOLT-4 and CCRF-CEM  
470 with daunorubicin resulted in increased the level of p53, p27 and p21, corresponding with  
471 increased levels of DNA DSBs and cell cycle arrest. In contrast, SUP-B15 cells showed  
472 decreases in the levels of p53, p27 and p21. Several studies have provided compelling evidence  
473 relating the mutations in p53 with chemoresistance to various cytotoxic drugs [38, 47-50].

474           Following DNA damage, phosphorylation of p53 at Ser15 by ATM or other kinases  
475 inhibits the binding of MDM2 to p53 and this leads to increased activity of p53. Anthracycline  
476 mediated cell cycle arrest may take place at G1 or G2 checkpoints and this can be mediated  
477 through the multifunctional transcription factor p53 [51, 52]. p53 induces p21 (CDK inhibitor)

478 expression and therefore, inactivation of p53 will also result in decreasing levels of p21 [53].  
479 p27 is also a member of CIP/KIP and controls cell progression from G1 to S phase by mediating  
480 G1 arrest through inhibiting cyclin/CDK complex activities [54]. Normally, p53 may boost  
481 chemosensitivity through enhancing p21-mediated growth arrest and DNA repair [55]. p53 has  
482 two functional roles, it can induce cell cycle arrest, through the transactivation of the p21 or  
483 induction of apoptosis [56].

## 484 **Conclusions**

485 In summary, the study provides additional insight into the mechanism of action of  
486 daunorubicin on DNA DSB formation, DNA repair and the cell cycle arrest in acute  
487 lymphoblastic leukaemia cell lines. The delay in DSB repair and lower sensitivity to  
488 daunorubicin in the B lymphoblastic SUP-B15 cells is likely to involve loss of p53 function  
489 amongst other factors. These factors may contribute in inhibiting or affecting DNA repair  
490 pathways. As p53, p21 and p27 phospho-kinase proteins play essential roles in tumour  
491 progression and clinical outcomes in acute lymphoblastic leukaemia, the presence and activity  
492 regulatory proteins should be taken into consideration in devising personalized treatment  
493 regimens.

494

## 495 **Acknowledgements**

496 The authors would like to thank La Trobe Institute of Molecular Sciences (LIMS) and La Trobe  
497 University for supporting the research. Hussain Al-Aamri would like to thank the Ministry of  
498 Higher Education, Government of Oman for providing a Postgraduate Research Scholarship.

499

## 500 References

- 501 1. Weiss RB. The anthracyclines: will we ever find a better doxorubicin? Seminars in  
502 oncology: Elsevier; 1992.
- 503 2. Agudelo D, Bourassa P, Bérubé G, Tajmir-Riahi H-A. Intercalation of antitumor drug  
504 doxorubicin and its analogue by DNA duplex: structural features and biological  
505 implications. International Journal of Biological Macromolecules. 2014;66:144-50.
- 506 3. Nelson EM, Tewey KM, Liu LF. Mechanism of antitumor drug action: poisoning of  
507 mammalian DNA topoisomerase II on DNA by 4'-(9-acridinylamino)-methanesulfon-m-  
508 anisidide. Proceedings of the National Academy of Sciences USA. 1984;81:1361-5.
- 509 4. Gewirtz D, A critical evaluation of the mechanisms of action proposed for the antitumor  
510 effects of the anthracycline antibiotics adriamycin and daunorubicin. Biochemical  
511 pharmacology, 1999. 57(7): p. 727-741. A critical evaluation of the mechanisms of action  
512 proposed for the antitumor effects of the anthracycline antibiotics adriamycin and  
513 daunorubicin. Biochemical Pharmacology. 1999;57:727-41.
- 514 5. Stiff T, Walker SA, Cersaletti K, Goodarzi AA, Petermann E, Concannon P, et al.  
515 ATR-dependent phosphorylation and activation of ATM in response to UV treatment or  
516 replication fork stalling. The EMBO Journal. 2006;25:5775-82.
- 517 6. Tanaka T, Halicka HD, Huang X, Traganos F, Darzynkiewicz Z. Constitutive histone  
518 H2AX phosphorylation and ATM activation, the reporters of DNA damage by  
519 endogenous oxidants. Cell Cycle. 2006;5:1940-5.
- 520 7. Rogakou EP, Boon C, Redon C, Bonner WM. Megabase chromatin domains involved in  
521 DNA double-strand breaks *in vivo*. The Journal of Cell Biology. 1999;146:905-16.
- 522 8. Evison BJ, Chiu F, Pezzoni G, Phillips DR, Cutts SM. Formaldehyde-activated  
523 pixantrone is a monofunctional DNA alkylator that binds selectively to CpG and CpA  
524 doublets. Molecular Pharmacology. 2008;74:184-94.
- 525 9. Armata HL, Golebiowski D, Jung DY, Ko HJ, Kim JK, Sluss HK. Requirement of the  
526 ATM/p53 tumor suppressor pathway for glucose homeostasis. Molecular and Cellular  
527 Biology 2010;30:5787-94.
- 528 10. Vogelstein B, Lane D, Levine AJ. Surfing the p53 network. Nature. 2000;408:307-10.
- 529 11. Bunz F, Dutriaux A, Lengauer C, Waldman T, Zhou S, Brown J, et al. Requirement for  
530 p53 and p21 to sustain G2 arrest after DNA damage. Science. 1998;282:1497-501.
- 531 12. Guo Z, Deshpande R, Paull TT. ATM activation in the presence of oxidative stress. Cell  
532 Cycle. 2010;9:4805-11.
- 533 13. Stojak M, Mazur L, Opydo-Chanek M, Łukawska M, Oszczapowicz I. *In vitro* induction  
534 of apoptosis and necrosis by new derivatives of daunorubicin. Anticancer Research.  
535 2013;33:4439-43.
- 536 14. Cremona C, Behrens A. ATM signalling and cancer. Oncogene. 2014;33:3351.
- 537 15. Eruslanov E, Kusmartsev S. Identification of ROS using oxidized DCFDA and flow-  
538 cytometry. Advanced protocols in oxidative stress II Springer; 2010. p. 57-72.
- 539 16. Liu Y-W, Sakaeda T, Takara K, Nakamura T, Ohmoto N, Komoto C, et al. Effects of  
540 reactive oxygen species on cell proliferation and death in HeLa cells and its MDR1-  
541 overexpressing derivative cell line. Biological and Pharmaceutical Bulletin.  
542 2003;26:278-81.
- 543 17. Maréchal A, Zou L. DNA damage sensing by the ATM and ATR kinases. Cold Spring  
544 Harbor Perspectives in Biology. 2013;5:a012716.
- 545 18. Stojak M, Mazur L, Opydo-Chanek M, Łukawska M, Oszczapowicz I. Effects of  
546 structural modifications of daunorubicin on *in vitro* antileukemic activity. Anticancer  
547 Research. 2012;32:5271-7.

- 548 19. Wasowska-Lukawska M, Wietrzyk J, Opolski A, Oszczapowicz J, Oszczapowicz I.  
549 Biological properties of new derivatives of daunorubicin. *In Vivo*. 2007;21:413-6.
- 550 20. Boland MP, Foster SJ, O'Neill LA. Daunorubicin activates NF $\kappa$ B and induces  $\kappa$ B-  
551 dependent gene expression in HL-60 promyelocytic and Jurkat T lymphoma cells.  
552 *Journal of Biological Chemistry*. 1997;272:12952-60.
- 553 21. Hanna AD, Janczura M, Cho E, Dulhunty AF, Beard NA. Multiple actions of the  
554 anthracycline daunorubicin on cardiac ryanodine receptors. *Molecular Pharmacology*.  
555 2011;80:538-49.
- 556 22. Shorey LE, Hagman AM, Williams DE, Ho E, Dashwood RH, Benninghoff AD. 3, 3'-  
557 Diindolylmethane induces G1 arrest and apoptosis in human acute T-cell lymphoblastic  
558 leukemia cells. *PLoS One*. 2012;7:e34975.
- 559 23. Min J, Wang X, Tong Y, Li X, Tao D, Hu J, et al. Expression of cyclins in high-density  
560 cultured cells and in vivo tumor cells. *Cytometry Part A*. 2012;81:874-82.
- 561 24. Qin J, Tao D, Duan R, Leng Y, Shen M, Zhou H, et al. Cytokinetic analysis of cell cycle  
562 and sub-phases in MOLT-4 cells by cyclin E+ A/DNA multiparameter flow cytometry.  
563 *Oncology Reports*. 2002;9(1041-1045).
- 564 25. Traganos F, Ardelt B, Halko N, Bruno S, Darzynkiewicz Z. Effects of genistein on the  
565 growth and cell cycle progression of normal human lymphocytes and human leukemic  
566 MOLT-4 and HL-60 cells. *Cancer Research*. 1992;52:6200-8.
- 567 26. Alsadeq A, Strube S, Krause S, Carlet M, Jeremias I, Vokuhl C, et al. Effects of p38 $\alpha$ / $\beta$   
568 inhibition on acute lymphoblastic leukemia proliferation and survival *in vivo*. *Leukemia*.  
569 2015;29:2307.
- 570 27. Naumovski L, Morgan R, Hecht F, Link MP, Glader BE, Smith SD. Philadelphia  
571 chromosome-positive acute lymphoblastic leukemia cell lines without classical  
572 breakpoint cluster region rearrangement. *Cancer Research*. 1988;48:2876-9.
- 573 28. Heaton RK, Franklin DR, Ellis RJ, McCutchan JA, Letendre SL, LeBlanc S, et al. HIV-  
574 associated neurocognitive disorders before and during the era of combination  
575 antiretroviral therapy: differences in rates, nature, and predictors. *Journal of*  
576 *Neurovirology*. 2011;17:3-16.
- 577 29. Stojak M, Łukawska M, Oszczapowicz I, Opydo-Chanek M, Mazur L. Cell-cycle  
578 disturbance and induction of programmed death by new formamidine analogs of  
579 daunorubicin *Anticancer Research*. 2014;34:7151-8.
- 580 30. Amstad P, Moret R, Cerutti P. Glutathione peroxidase compensates for the  
581 hypersensitivity of Cu, Zn-superoxide dismutase overproducers to oxidant stress. *Journal*  
582 *of Biological Chemistry*. 1994;269:1606-9.
- 583 31. Hussain SP, Amstad P, He P, Robles A, Lupold S, Kaneko I, et al. p53-induced up-  
584 regulation of MnSOD and GPx but not catalase increases oxidative stress and apoptosis.  
585 *Cancer Research*. 2004;64:2350-6.
- 586 32. Zenz T, Häbe S, Denzel T, Mohr J, Winkler D, Bühler A, et al. Detailed analysis of p53  
587 pathway defects in fludarabine-refractory chronic lymphocytic leukemia (CLL):  
588 dissecting the contribution of 17p deletion, TP53 mutation, p53-p21 dysfunction, and  
589 miR34a in a prospective clinical trial. *Blood*. 2009;114:2589-97.
- 590 33. Liu B, Chen Y, Clair DKS. ROS and p53: a versatile partnership. *Free Radical Biology*  
591 *and Medicine*. 2008;44:1529-35.
- 592 34. Candas D, Li JJ. MnSOD in oxidative stress response-potential regulation via  
593 mitochondrial protein influx. *Antioxidants and Redox Signaling*. 2014;20:1599-617.
- 594 35. Redon C, Pilch D, Rogakou E, Sedelnikova O, Newrock K, Bonner W. Histone H2a  
595 variants H2AX and H2AZ. *Current Opinion in Genetics and Development*.  
596 2002;12:162-9.

- 597 36. Ciesielska E, Studzian K, Wąsowska M, Oszczapowicz I, Szmigiero L. Cytotoxicity,  
598 cellular uptake and DNA damage by daunorubicin and its new analogues with modified  
599 daunosamine moiety *Cell Biology and Toxicology*. 2005;21:139-47.
- 600 37. Lotfi K, Zackrisson A-L, Peterson C. Comparison of idarubicin and daunorubicin  
601 regarding intracellular uptake, induction of apoptosis, and resistance. *Cancer Letters*.  
602 2002;178:141-9.
- 603 38. Oren M, Rotter V. Mutant p53 gain-of-function in cancer. *Cold Spring Harbor  
604 Perspectives in Biology*. 2002;2:a001107.
- 605 39. Rivlin N, Brosh R, Oren M, Rotter V. Mutations in the p53 tumor suppressor gene:  
606 important milestones at the various steps of tumorigenesis. *Genes and Cancer*.  
607 2011;2:466-74.
- 608 40. Huhn D, Bolck HA, Sartori AA. Targeting DNA double-strand break signalling and  
609 repair: recent advances in cancer therapy. *Swiss Medical Weekly*. 2013;143:w13837.
- 610 41. Lee JT, Steelman LS, McCubrey JA. Phosphatidylinositol 3'-kinase activation leads to  
611 multidrug resistance protein-1 expression and subsequent chemoresistance in advanced  
612 prostate cancer cells. *Cancer Research*. 2004;64: 8397-404.
- 613 42. Stronach EA, Alfraidi A, Rama N, Datler C, Studd JB, Agarwal R, et al. HDAC4-  
614 regulated STAT1 activation mediates platinum resistance in ovarian cancer. *Cancer  
615 Research*. 2011;71: 4412-22.
- 616 43. Chikayama S, Kimura S, Kobayashi Y, Abe T, Maekawa T, Kondo M. Effects of  
617 daunorubicin on cell growth, cell cycle and induction of apoptosis in HL-60 cells.  
618 *Haematologia*. 1998;29:115-21.
- 619 44. Savatier J, Rharass T, Canal C, Gbankoto A, Vigo J, Salmon J-M, et al. Adriamycin dose  
620 and time effects on cell cycle, cell death, and reactive oxygen species generation in  
621 leukaemia cells. *Leukemia Research*. 2012;36:791-8.
- 622 45. Lüpertz R, Wätjen W, Kahl R, Chovolou Y. Dose-and time-dependent effects of  
623 doxorubicin on cytotoxicity, cell cycle and apoptotic cell death in human colon cancer  
624 cells. *Toxicology*. 2010;271:115-21.
- 625 46. Weller M. Predicting response to cancer chemotherapy: the role of p53. *Cell and Tissue  
626 Research* 1998;292:435-45.
- 627 47. Bunz F, Hwang PM, Torrance C, Waldman T, Zhang Y, Dillehay L, et al. Disruption of  
628 p53 in human cancer cells alters the responses to therapeutic agents. *Journal of Clinical  
629 Investigation*. 1999;104:263-9.
- 630 48. Lee JM, Bernstein A. p53 mutations increase resistance to ionizing radiation.  
631 *Proceedings of the National Academy of Sciences USA*. 1993;90:5742-6.
- 632 49. Lowe SW, Bodis S, McClatchey A, Remington L, Ruley HE, Fisher DE, et al. p53 status  
633 and the efficacy of cancer therapy *in vivo*. *Science*. 1994;266:807-10.
- 634 50. Smith ML, Chen I-T, Zhan Q, O'Connor PM, Fornace Jr AJ. Involvement of the p53  
635 tumor suppressor in repair of UV-type DNA damage. *Oncogene*. 1995;10:1053-9  
636
- 637 51. Agarwal ML, Taylor WR, Chernov MV, Chernova OB, Stark GR. The p53 network.  
638 *Journal of Biological Chemistry*. 1998;273:1-4.
- 639 52. Lowe SW, Lin AW. Apoptosis in cancer. *Carcinogenesis*. 2000;21:485-95.
- 640 53. Westfall MD, Mays DJ, Sniezek JC, Pietenpol JA. The  $\Delta Np63\alpha$  phosphoprotein binds  
641 the p21 and 14-3-3 $\sigma$  promoters *in vivo* and has transcriptional repressor activity that is  
642 reduced by Hay-Wells syndrome-derived mutations. *Molecular and Cellular Biology*.  
643 2003;23:2264-76.
- 644 54. Wang X, Gorospe M, Huang Y, Holbrook NJ. p27<sup>Kip1</sup> overexpression causes apoptotic  
645 death of mammalian cells. *Oncogene*. 1997;15:2991-7.



- 646 55. Ford JM, Hanawalt PC. Expression of wild-type p53 is required for efficient global  
647 genomic nucleotide excision repair in UV-irradiated human fibroblasts. *Journal of*  
648 *Biological Chemistry*. 1997;272:28073-80.  
649 56. Roos WP, Kaina B. DNA damage-induced cell death by apoptosis. *Trends in Molecular*  
650 *Medicine*. 2006;12:440-50.  
651

## 652 **Supporting Information**

653 **S1 Fig. Examples of histograms used for the ROS assay.** Illustrative histograms obtained  
654 from (A) MOLT-4, (B) CCRF-CEM, and (C) SUP-B15 cell lines.

655 **S2 Fig. Examples of histograms used for the gamma H2AX assay.** Illustrative histograms  
656 obtained from (A) MOLT-4, (B) CCRF-CEM, and (C) SUP-B15 cell lines

657

658 **S1 Table. Primers used to amplify the ATM cDNA.**

659 **S2 Table. PCR conditions for the different primer sets to amplify ATM.**

660

**A**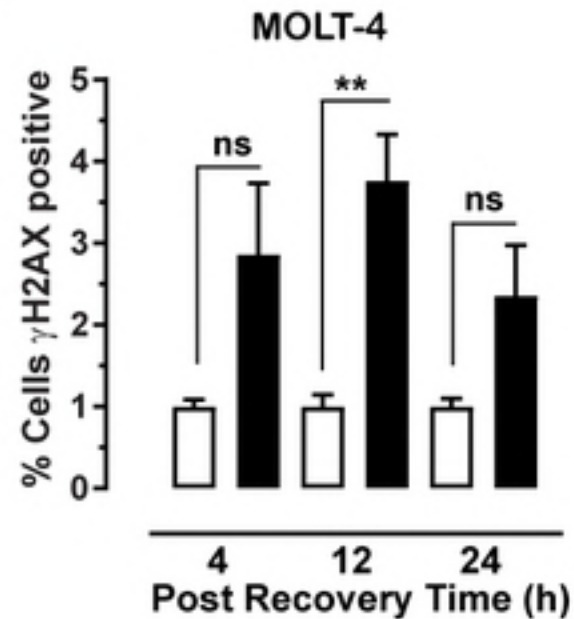**B**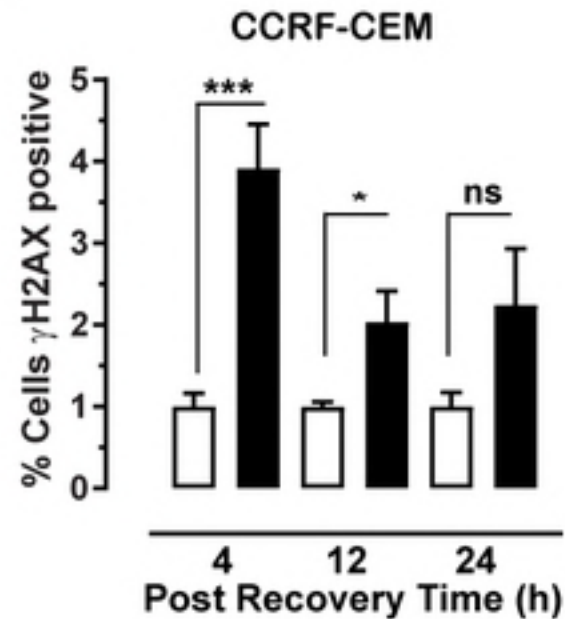**C**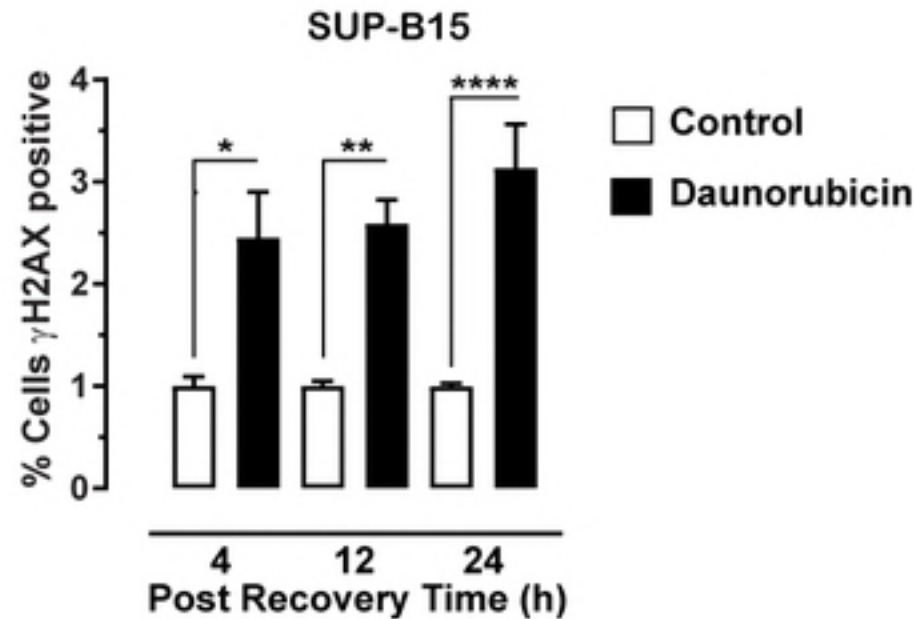

A

MOLT-4

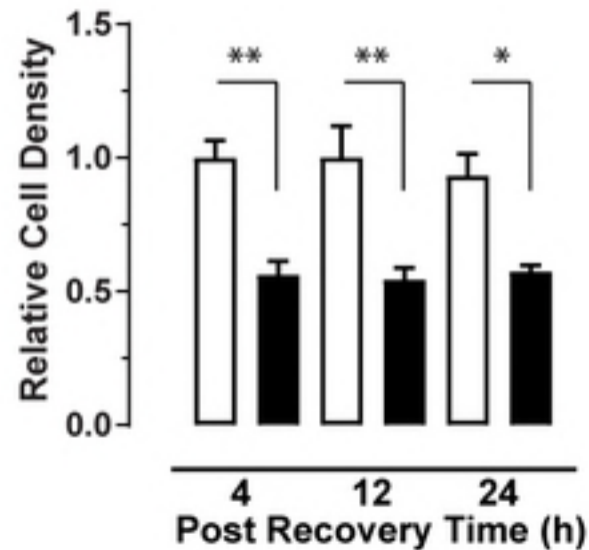

B

CCRF-CEM

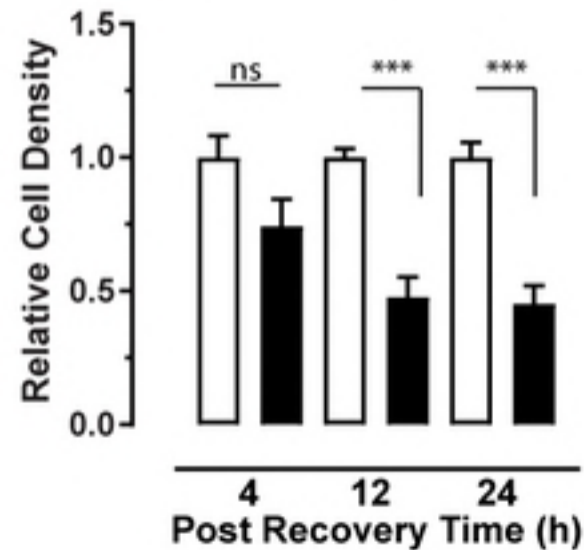

C

SUP-B15

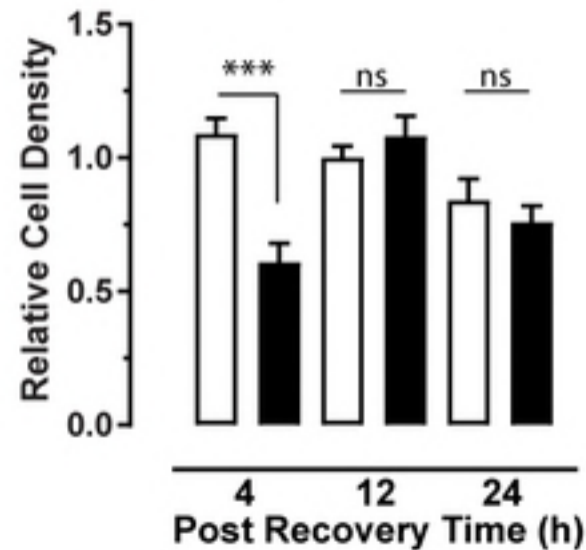

□ Control

■ Daunorubicin

**A**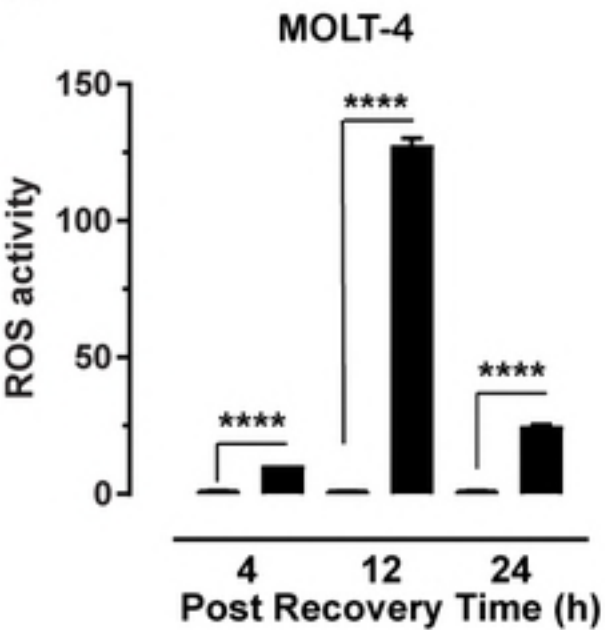**B**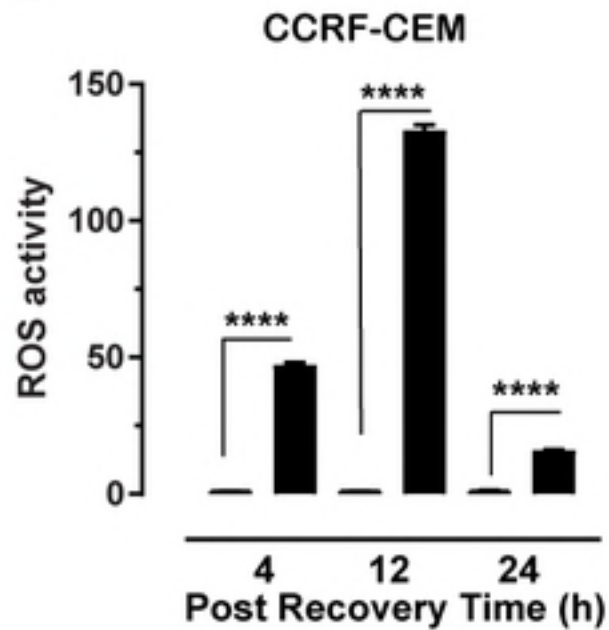**C**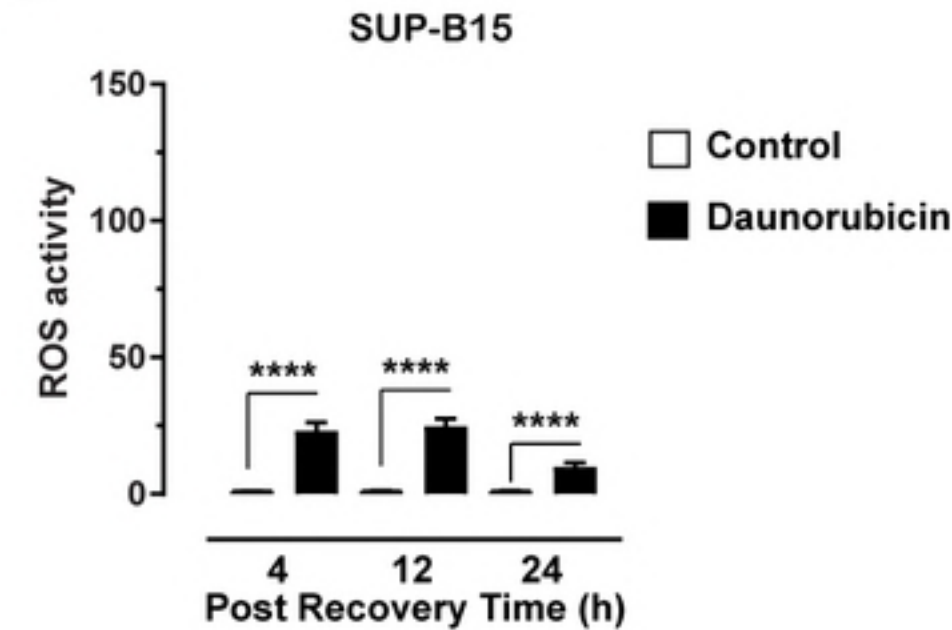

A

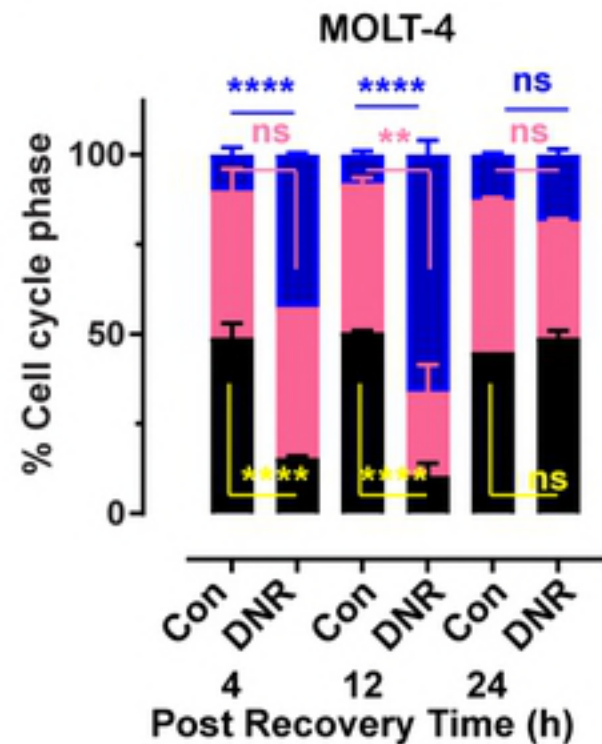

B

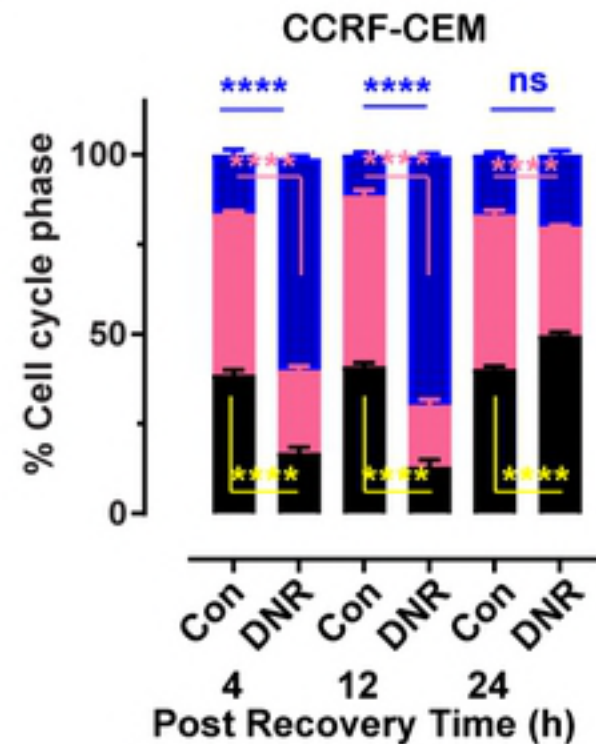

C

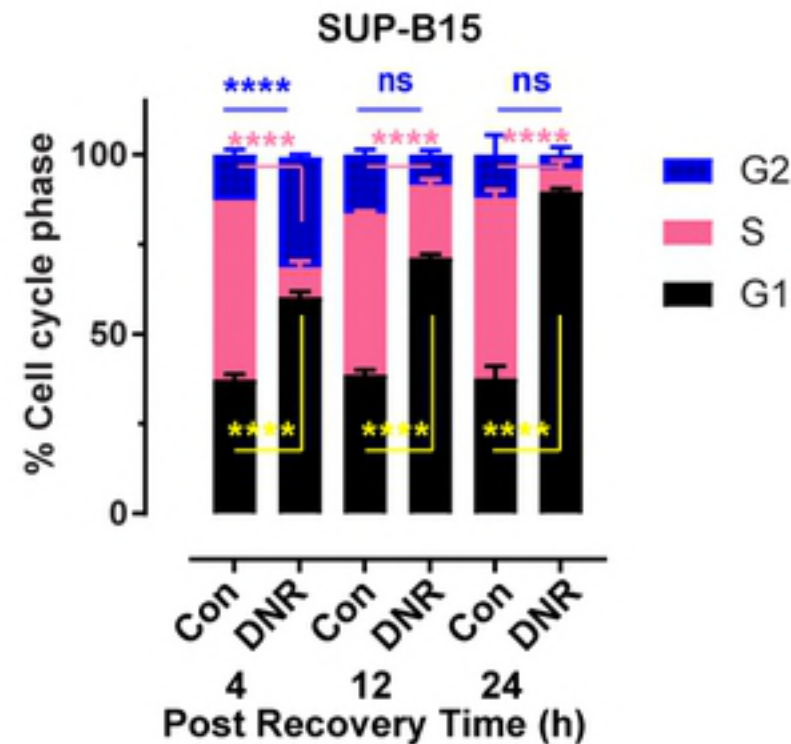

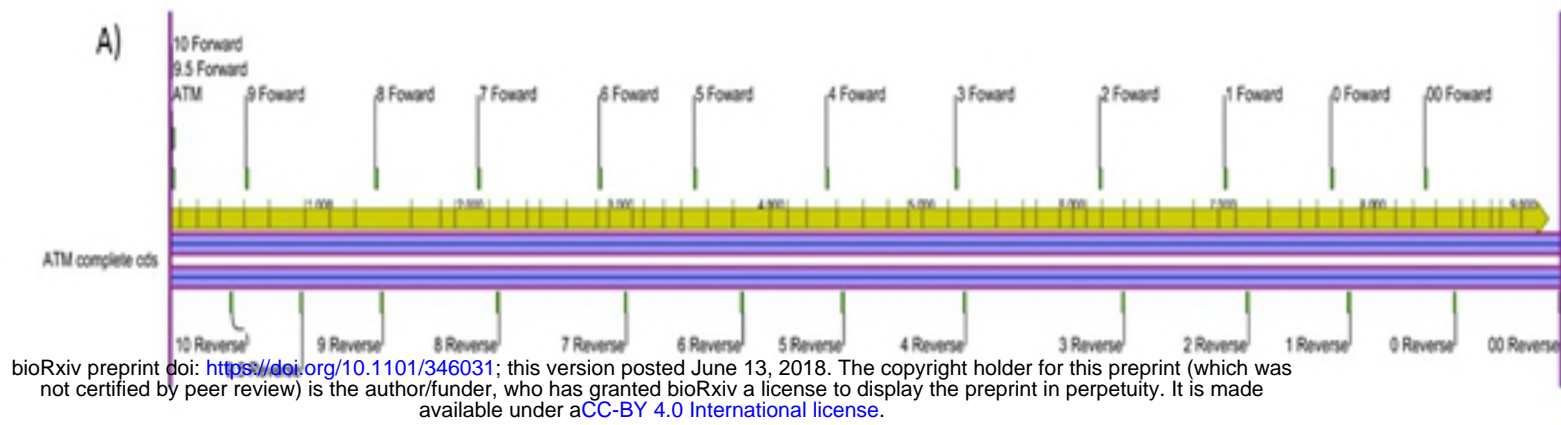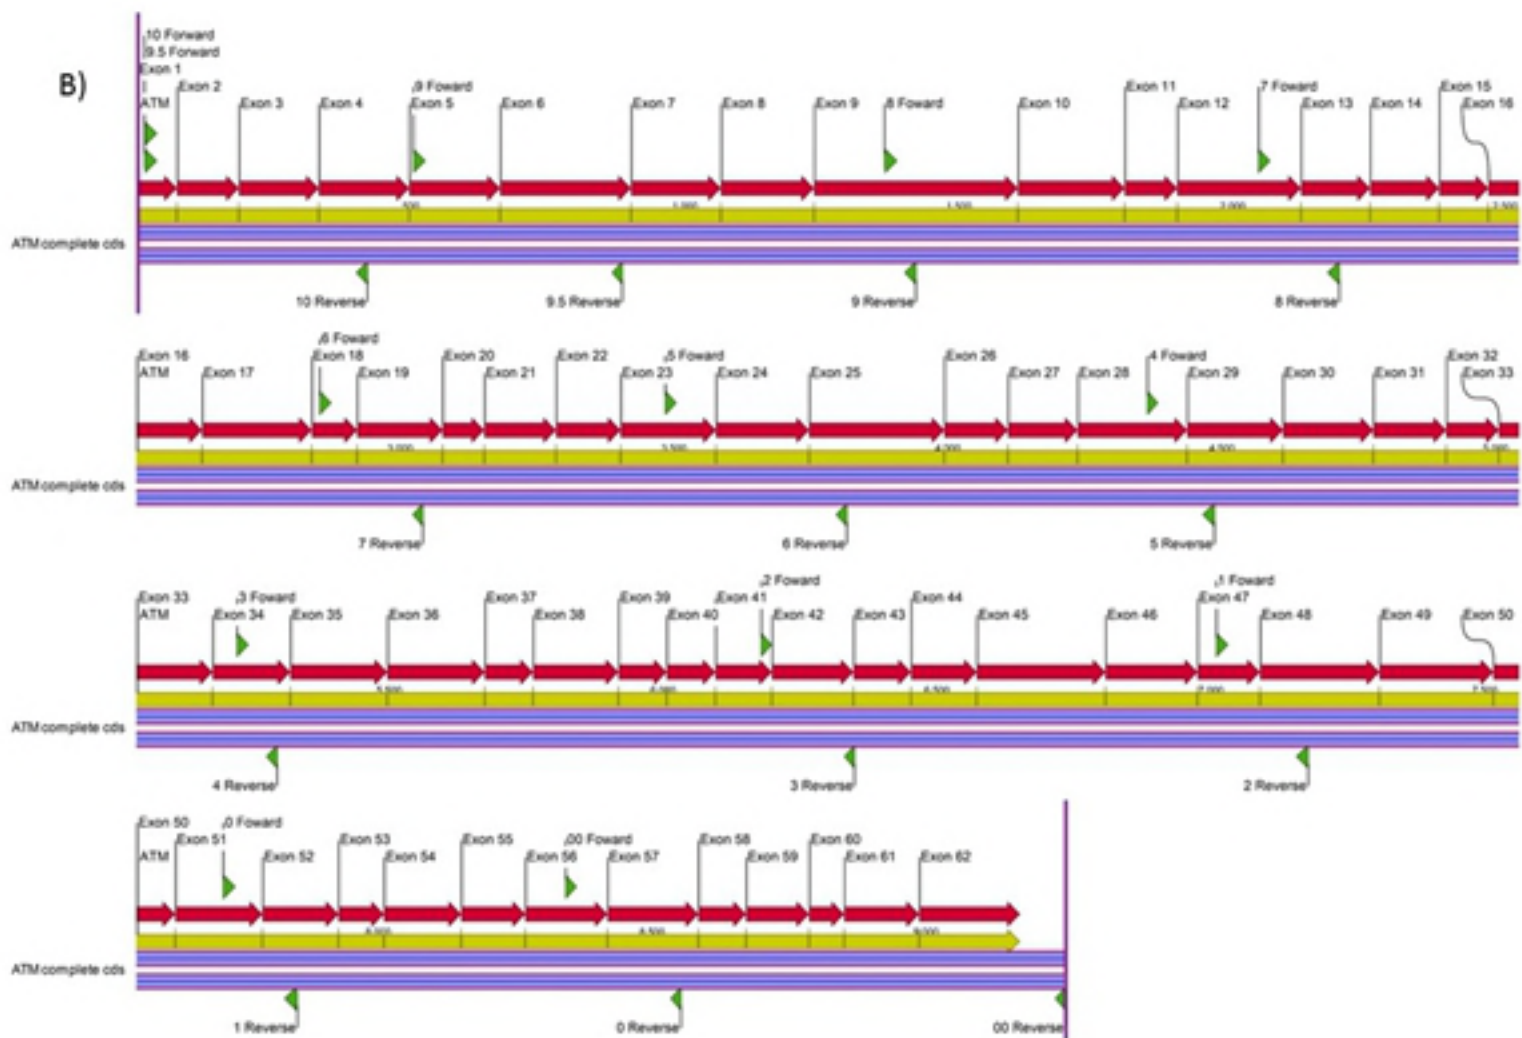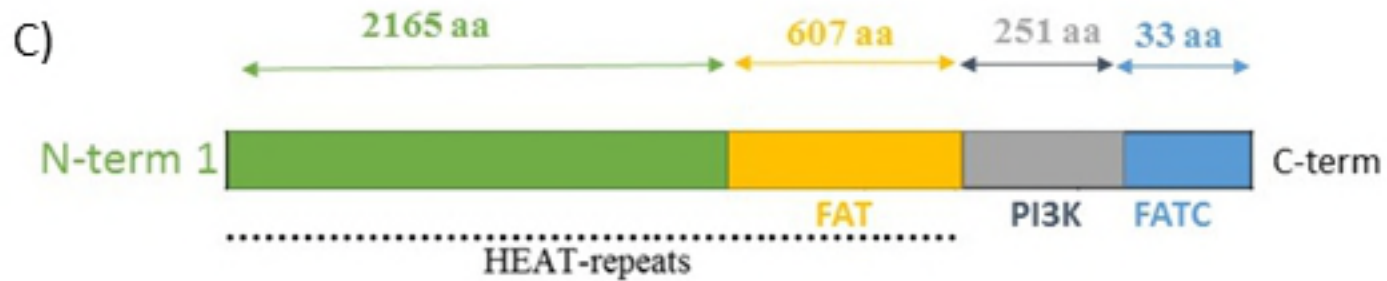

**A**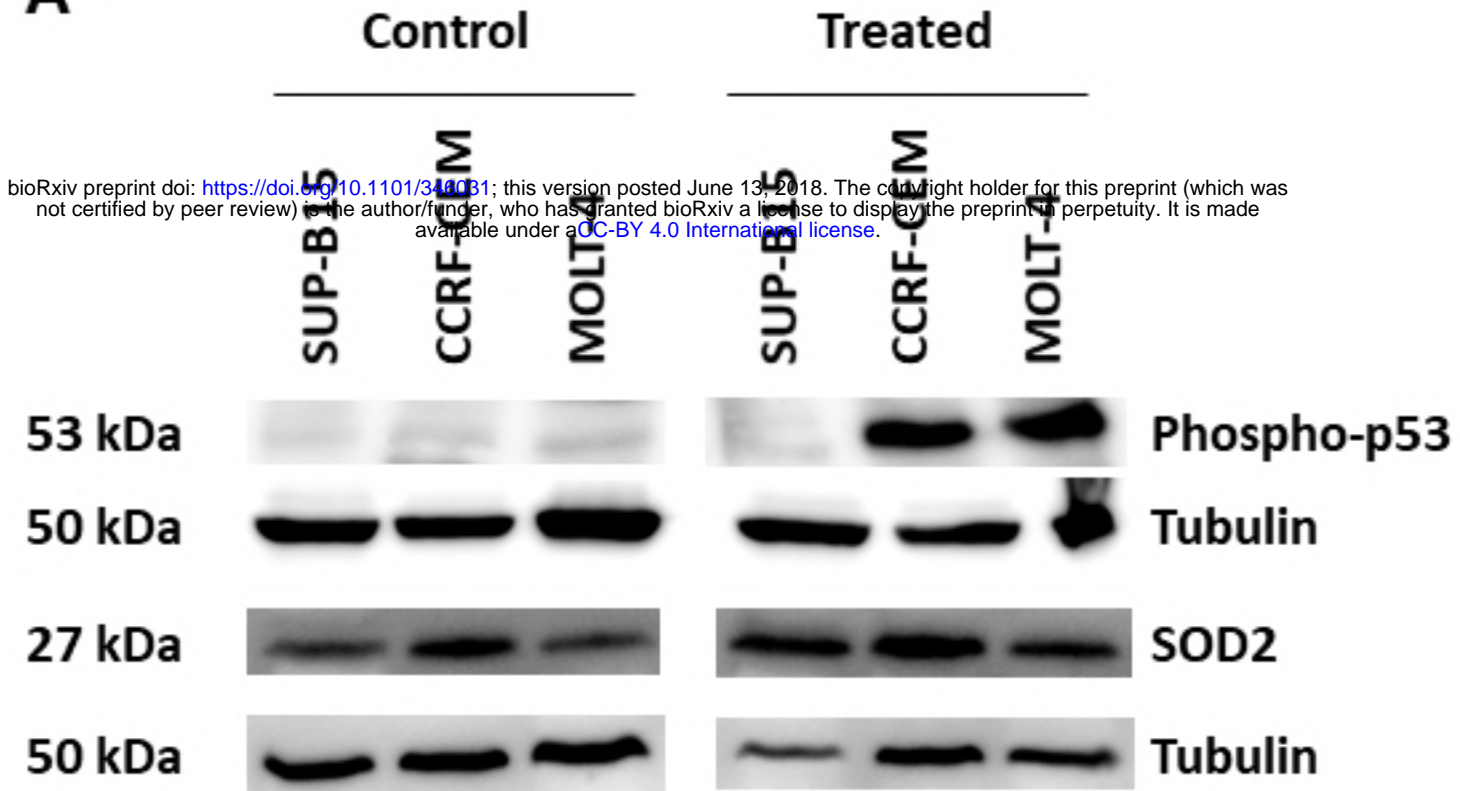**B**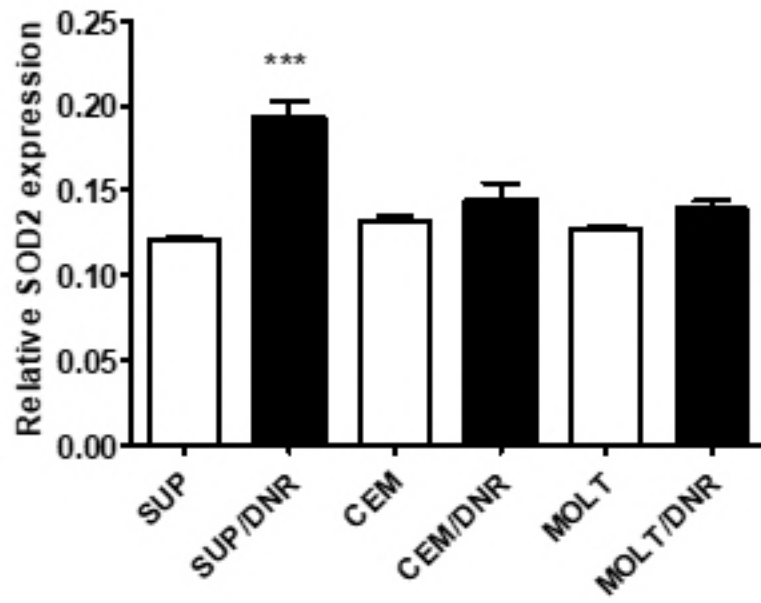

Source: https://www.biorxiv.org/content/10.1101/346031v1.full.pdf
